# Supplementary material for: The role of commensal microbes in the lifespan of Drosophila melanogaster
Source: publisher site journal article supplement (doi:10.18632/aging.102073), 2019-07-12
Supplement: Supplementary file [file aging-v11i13-102073-supplementary-material-SD2.pdf]

## Supplementary Tables

**Supplementary Table 1. Lifespan of axenic flies.**

| Group                      |                    | n   | Mean Lifespan<br>(Day) | Median<br>Lifespan<br>(Day) | Maximum<br>Lifespan <sup>†</sup><br>(Day) | Log-rank |          | Wilcoxon |          |
|----------------------------|--------------------|-----|------------------------|-----------------------------|-------------------------------------------|----------|----------|----------|----------|
| Fly                        | Treat              |     |                        |                             |                                           | $\chi^2$ | p-value  | $\chi^2$ | p-value  |
| Conv                       | DW <sup>†</sup>    | 191 | 59.92 ± 1.52           | 70                          | 76                                        |          |          |          |          |
| Ax                         | 1G                 | 179 | 53.83 ± 1.31           | 58                          | 66                                        | 38.85    | <0.0001* | 20.81    | <0.0001* |
|                            | 2G                 | 190 | 68.52 ± 0.94           | 72                          | 74                                        | 0.08     | 0.7710   | 8.91     | 0.00288* |
|                            | 3G                 | 173 | 70.73 ± 0.85           | 72                          | 76                                        | 8.20     | 0.0042*  | 18.93    | <0.0001* |
|                            | Conv               | 180 | 65.41 ± 1.54           | 72                          | 80                                        | 20.42    | <0.0001* | 13.92    | 0.0002*  |
|                            | Ax <sup>†</sup>    | 191 | 73.00 ± 1.40           | 76                          | 84                                        |          |          |          |          |
| Ax + Feces <sup>Conv</sup> |                    | 174 | 68.15 ± 1.30           | 74                          | 80                                        | 22.61    | <0.0001* | 13.72    | 0.0002*  |
| Conv                       | ×0 AB <sup>†</sup> | 193 | 62.73 ± 1.32           | 69                          | 77                                        |          |          |          |          |
|                            | ×0.1 AB            | 184 | 68.93 ± 1.16           | 71                          | 81                                        | 12.33    | 0.0004*  | 11.02    | 0.0009*  |
|                            | ×0.5 AB            | 186 | 67.84 ± 0.99           | 69                          | 77                                        | 2.86     | 0.0911   | 3.59     | 0.058    |
|                            | ×1.0 AB            | 180 | 62.89 ± 1.21           | 64                          | 73                                        | 0.53     | 0.4659   | 0.48     | 0.4898   |
| Ax                         | ×0 AB <sup>†</sup> | 183 | 77.17 ± 1.32           | 83                          | 87                                        |          |          |          |          |
|                            | ×0.1 AB            | 184 | 77.44 ± 1.34           | 85                          | 87                                        | 1.41     | 0.2347   | 0.71     | 0.4004   |
|                            | ×0.5 AB            | 192 | 77.97 ± 1.06           | 81                          | 87                                        | 0.64     | 0.4238   | 0.24     | 0.6254   |
|                            | ×1.0 AB            | 180 | 65.94 ± 1.34           | 69                          | 79                                        | 64.01    | <0.0001* | 63.64    | <0.0001* |
| <i>w<sup>1118</sup></i>    | Conv <sup>†</sup>  | 189 | 70.36 ± 1.59           | 75                          | 87                                        | 146.33   | <0.0001* | 146.66   | <0.0001* |
|                            | Ax                 | 188 | 92.88 ± 0.94           | 96                          | 100                                       |          |          |          |          |
| Oregon-R                   | Conv <sup>†</sup>  | 155 | 71.18 ± 1.86           | 75                          | 94                                        | 37.43    | <0.0001* | 26.41    | <0.0001* |
|                            | Ax                 | 182 | 83.15 ± 1.69           | 90                          | 98                                        |          |          |          |          |
| Canton-S                   | Conv <sup>†</sup>  | 188 | 79.26 ± 1.30           | 82                          | 92                                        | 6.60     | 0.0102*  | 2.22     | 0.136    |
|                            | Ax                 | 183 | 81.66 ± 1.47           | 85                          | 96                                        |          |          |          |          |

<sup>†</sup> These letters indicate a control for statistical analysis.

<sup>‡</sup> Maximum lifespan means average of the last 25% of surviving flies.

\* Asterisks indicate significant differences compared to control.

**Supplementary Table 2. Richness and diversity estimation of the 16S rRNA gene libraries from the 454-pyrosequencing analysis.**

| Sample   | Valid reads | OTUs <sup>a</sup> | Species richness indices |       | Species diversity indices |         |         |
|----------|-------------|-------------------|--------------------------|-------|---------------------------|---------|---------|
|          |             |                   | Ace                      | Chao1 | JackKnife                 | Shannon | Simpson |
| Young #1 | 5,092       | 258               | 301                      | 279   | 318                       | 3       | 0       |
| Young #2 | 5,473       | 406               | 523                      | 484   | 543                       | 3       | 0       |
| Young #3 | 5,093       | 320               | 371                      | 347   | 395                       | 3       | 0       |
| Old #1   | 7,704       | 707               | 844                      | 781   | 890                       | 4       | 0       |
| Old #2   | 8,781       | 610               | 739                      | 685   | 776                       | 4       | 0       |
| Old #3   | 8,294       | 589               | 697                      | 656   | 743                       | 4       | 0       |

<sup>a</sup> The operational taxonomic units (OTUs) were defined with pairwise 97% ID.

Please browse Full Text version to see the data of Supplementary Table 3:

**Supplementary Table 3. Bacteria listed by 454-Pyrosequencing.**

**Supplementary Table 4. Lifespan of Ax flies fed Conv homogenate.**

| Group |                            | n   | Mean Lifespan (Day) | Median Lifespan (Day) | Maximum Lifespan <sup>†</sup> (Day) | Log-rank |          | Wilcoxon |          |
|-------|----------------------------|-----|---------------------|-----------------------|-------------------------------------|----------|----------|----------|----------|
| Fly   | Treat                      |     |                     |                       |                                     | $\chi^2$ | p-value  | $\chi^2$ | p-value  |
| Conv  | DW                         | 101 | 62.74 ± 2.08        | 66                    | 80                                  | 45.98    | <0.0001* | 51.93    | <0.0001* |
|       | DW <sup>†</sup>            | 95  | 82.64 ± 2.05        | 86                    | 92                                  |          |          |          |          |
| Ax    | Homogenate <sup>Co,Y</sup> | 90  | 75.93 ± 2.09        | 80                    | 88                                  | 4.61     | <0.0318* | 9.77     | 0.0018*  |
|       | Homogenate <sup>Co,O</sup> | 103 | 64.46 ± 2.32        | 70                    | 84                                  | 43.12    | <0.0001* | 42.91    | <0.0001* |
|       | Homogenate <sup>Ax,Y</sup> | 94  | 82.39 ± 2.06        | 86                    | 92                                  | 2.43     | 0.1192   | 0.40     | 0.5281   |
| Conv  | Homogenate <sup>Co,O</sup> | 99  | 79.14 ± 2.21        | 82                    | 90                                  | 0.49     | 0.4851   | 2.72     | 0.0991   |
|       | DW                         | 38  | 67.55 ± 2.53        | 74                    | 76                                  | 20.78    | <0.0001* | 11.26    | 0.0008*  |
| Ax    | DW <sup>†</sup>            | 34  | 73.18 ± 4.11        | 83                    | 90                                  |          |          |          |          |
|       | Gut                        |     |                     |                       |                                     |          |          |          |          |
| Ax    | Homogenate <sup>Co,Y</sup> | 38  | 75.47 ± 2.89        | 82                    | 85                                  | 0.02     | 0.8786   | 0.10     | 0.7470   |
|       | Gut                        |     |                     |                       |                                     |          |          |          |          |
| Ax    | Homogenate <sup>Co,O</sup> | 36  | 44.22 ± 3.27        | 41                    | 60                                  | 38.41    | <0.0001  | 26.56    | <0.0001  |
|       | DW                         | 193 | 77.69 ± 1.53        | 87                    | 92                                  | 9.37     | 0.0022*  | 6.21     | 0.0127*  |
|       | ×1 Young <sup>†</sup>      | 188 | 76.96 ± 1.42        | 83                    | 92                                  |          |          |          |          |
|       | ×0.001 Old                 | 199 | 72.37 ± 1.71        | 83                    | 87                                  | 2.30     | 0.1293   | 2.57     | 0.1090   |
|       | ×0.01 Old                  | 199 | 74.33 ± 1.32        | 80                    | 87                                  | 8.35     | 0.0038*  | 5.47     | 0.0193*  |
|       | ×0.1 Old                   | 195 | 70.37 ± 1.38        | 75                    | 85                                  | 20.06    | <0.0001* | 17.46    | <0.0001* |
|       | ×1 Old                     | 189 | 66.74 ± 1.34        | 73                    | 80                                  | 55.63    | <0.0001* | 45.34    | <0.0001* |
|       | DW                         | 83  | 83.92 ± 1.82        | 89                    | 93                                  | 50.50    | <0.0001* | 45.52    | <0.0001* |
| Ax    | ×0.5 Young                 | 86  | 70.52 ± 1.99        | 77                    | 83                                  | 0.61     | 0.4356   | 0.13     | 0.7164   |
|       | ×1 Young <sup>†</sup>      | 84  | 69.98 ± 1.87        | 75                    | 83                                  |          |          |          |          |
|       | ×2 Young                   | 95  | 67.28 ± 1.63        | 70                    | 79                                  | 5.40     | 0.0202*  | 2.23     | 0.1356   |

<sup>†</sup> These letters indicate a control for statistical analysis.

<sup>‡</sup> Maximum lifespan means average of the last 25% of surviving flies.

\* Asterisks indicate significant differences compared to control.

Supplementary Table 5. Lifespan of Ax flies inoculated with dominant microbe.

| Group                  |                         |                 | n     | Mean Lifespan (Day) | Median Lifespan (Day) | Maximum Lifespan <sup>†</sup> (Day) | Log-rank |          | Wilcoxon |          |          |          |
|------------------------|-------------------------|-----------------|-------|---------------------|-----------------------|-------------------------------------|----------|----------|----------|----------|----------|----------|
| Conc                   | Fly                     | Inoculum        |       |                     |                       |                                     | $\chi^2$ | p-value  | $\chi^2$ | p-value  |          |          |
| 10 <sup>3</sup><br>CFU | Ax                      | DW <sup>†</sup> | 188   | 72.69               | ± 1.17                | 78                                  | 82       |          |          |          |          |          |
|                        |                         | Lb              | 214   | 74.51               | ± 1.06                | 80                                  | 84       | 1.36     | 0.2428   | 1.95     | 0.1630   |          |
|                        |                         | Lp              | 193   | 75.40               | ± 1.14                | 80                                  | 84       | 4.99     | 0.0255*  | 4.66     | 0.0309*  |          |
|                        |                         | Ap              | 173   | 74.40               | ± 1.17                | 80                                  | 84       | 2.10     | 0.1475   | 1.69     | 0.1937   |          |
|                        | Ax                      | Am              | 181   | 74.97               | ± 1.22                | 80                                  | 84       | 6.11     | 0.0134*  | 3.97     | 0.0463*  |          |
|                        |                         | DW <sup>†</sup> | 179   | 85.59               | ± 0.97                | 88                                  | 92       |          |          |          |          |          |
|                        |                         | Lb              | 165   | 83.22               | ± 1.53                | 88                                  | 96       | 2.45     | 0.1173   | 0.42     | 0.5171   |          |
|                        |                         | Lp              | 154   | 85.89               | ± 1.27                | 90                                  | 94       | 3.50     | 0.0614   | 3.72     | 0.0539   |          |
|                        | Mono                    | Ap              | 166   | 82.07               | ± 1.15                | 84                                  | 90       | 3.61     | 0.0575   | 11.59    | 0.0007*  |          |
|                        |                         | Am              | 173   | 84.14               | ± 1.38                | 88                                  | 96       | 2.89     | 0.0890   | 0.04     | 0.8468   |          |
|                        |                         | Lb+Lp           | 171   | 80.91               | ± 1.31                | 86                                  | 92       | 2.47     | 0.1162   | 5.73     | 0.0167*  |          |
|                        |                         | Lb+Ap           | 173   | 82.91               | ± 1.14                | 86                                  | 94       | 0.87     | 0.3515   | 2.57     | 0.1089   |          |
| 10 <sup>8</sup><br>CFU | Dual                    | Lb+Am           | 167   | 82.64               | ± 1.29                | 86                                  | 94       | 0.00     | 0.9579   | 2.40     | 0.1217   |          |
|                        |                         | Lp+Ap           | 173   | 80.54               | ± 1.30                | 84                                  | 90       | 5.72     | 0.0168*  | 15.50    | <0.0001* |          |
|                        |                         | Lp+Am           | 156   | 83.90               | ± 1.19                | 87                                  | 94       | 0.04     | 0.8477   | 0.97     | 0.3243   |          |
|                        |                         | Ap+Am           | 164   | 79.08               | ± 1.31                | 84                                  | 90       | 5.94     | 0.0148*  | 16.32    | <0.0001* |          |
|                        | Triple                  | Lb+Lp+Ap        | 173   | 78.80               | ± 1.28                | 82                                  | 88       | 22.64    | <0.0001  | 30.15    | <0.0001* |          |
|                        |                         | Lb+Lp+Am        | 168   | 80.72               | ± 1.41                | 84                                  | 94       | 0.25     | 0.6197   | 6.46     | 0.0111*  |          |
|                        |                         | Lb+Ap+Am        | 170   | 81.62               | ± 1.32                | 85                                  | 94       | 0.07     | 0.7988   | 4.72     | 0.0299*  |          |
|                        |                         | Lp+Ap+Am        | 156   | 84.49               | ± 1.32                | 88                                  | 96       | 3.65     | 0.0561   | 0.00     | 0.9577   |          |
|                        | Quadruple<br>Ax         | Lb+Lp+Ap+Am     | 169   | 83.00               | ± 1.11                | 86                                  | 94       | 0.95     | 0.329    | 4.78     | 0.0288   |          |
|                        |                         | DW <sup>†</sup> | 180   | 76.68               | ± 1.58                | 84                                  | 90       |          |          |          |          |          |
|                        | 10 <sup>14</sup><br>CFU | Mono            | Lb    | 185                 | 63.89                 | ± 1.42                              | 68       | 78       | 92.74    | <0.0001* | 66.19    | <0.0001* |
|                        |                         |                 | Lp    | 189                 | 65.53                 | ± 1.38                              | 70       | 78       | 65.55    | <0.0001* | 54.68    | <0.0001* |
| Ap                     |                         |                 | 176   | 70.56               | ± 1.26                | 76                                  | 84       | 39.09    | <0.0001* | 30.50    | <0.0001* |          |
| Am                     |                         |                 | 173   | 65.17               | ± 1.42                | 70                                  | 78       | 65.64    | <0.0001* | 54.64    | <0.0001* |          |
| Dual                   |                         | Lb+Lp           | 199   | 63.74               | ± 1.65                | 68                                  | 82       | 50.35    | <0.0001* | 46.33    | <0.0001* |          |
|                        |                         | Lb+Ap           | 190   | 68.25               | ± 1.56                | 76                                  | 84       | 39.02    | <0.0001* | 31.44    | <0.0001* |          |
|                        |                         | Lb+Am           | 187   | 68.11               | ± 1.62                | 76                                  | 84       | 33.92    | <0.0001* | 30.11    | <0.0001* |          |
|                        |                         | Lp+Ap           | 174   | 66.72               | ± 1.70                | 74                                  | 82       | 39.66    | <0.0001* | 36.25    | <0.0001* |          |
| Triple                 |                         | Lp+Am           | 183   | 70.59               | ± 1.54                | 78                                  | 84       | 16.61    | <0.0001* | 19.05    | <0.0001* |          |
|                        |                         | Ap+Am           | 183   | 71.91               | ± 1.51                | 78                                  | 86       | 13.60    | 0.0002*  | 13.00    | 0.0003*  |          |
|                        |                         | Lb+Lp+Ap        | 192   | 67.64               | ± 1.51                | 72                                  | 82       | 52.62    | <0.0001* | 40.14    | <0.0001* |          |
|                        |                         | Lb+Lp+Am        | 189   | 67.72               | ± 1.50                | 74                                  | 84       | 41.68    | <0.0001* | 35.58    | <0.0001* |          |
| Quadruple              | Lb+Ap+Am                | 183             | 65.84 | ± 1.45              | 70                    | 80                                  | 62.75    | <0.0001* | 49.17    | <0.0001* |          |          |
|                        | Lp+Ap+Am                | 181             | 68.67 | ± 1.56              | 74                    | 84                                  | 17.92    | <0.0001* | 22.87    | <0.0001* |          |          |
|                        |                         | Lb+Lp+Ap+Am     | 190   | 69.34               | ± 1.67                | 78                                  | 86       | 20.53    | <0.0001* | 17.66    | <0.0001* |          |

<sup>†</sup> These letters indicate a control for statistical analysis.

<sup>‡</sup> Maximum lifespan means average of the last 25% of surviving flies.

\* Asterisks indicate significant differences compared to control.

**Supplementary Table 6. Log-rank test result of survival with a combination of microbes (10<sup>8</sup> CFUs).**

| <i>p</i> -value<br>(10 <sup>8</sup> CFUs) | Conv               | Ax      | Mono-association |           |           |           | Dual-association |              |              |              |              |              | Triple-association |                 |                 |                 | Quadruple-<br>association |        |
|-------------------------------------------|--------------------|---------|------------------|-----------|-----------|-----------|------------------|--------------|--------------|--------------|--------------|--------------|--------------------|-----------------|-----------------|-----------------|---------------------------|--------|
|                                           |                    |         | <i>Lb</i>        | <i>Lp</i> | <i>Ap</i> | <i>Am</i> | <i>Lb+Lp</i>     | <i>Lb+Ap</i> | <i>Lb+Am</i> | <i>Lp+Ap</i> | <i>Lp+Am</i> | <i>Ap+Am</i> | <i>Lb+Lp+Ap</i>    | <i>Lb+Lp+Am</i> | <i>Lb+Ap+Am</i> | <i>Lp+Ap+Am</i> | <i>Lb+Lp+Ap+Am</i>        |        |
| Conv                                      | 1                  | <0.0001 | <0.0001          | <0.0001   | <0.0001   | <0.0001   | <0.0001          | <0.0001      | <0.0001      | <0.0001      | <0.0001      | <0.0001      | <0.0001            | <0.0001         | <0.0001         | <0.0001         | <0.0001                   |        |
| Ax                                        | <0.0001            | 1       | 0.1173           | 0.0614    | 0.0575    | 0.089     | 0.1162           | 0.3515       | 0.9579       | 0.0168       | 0.8477       | 0.0148       | <0.0001            | 0.6197          | 0.7988          | 0.0561          | 0.329                     |        |
| Mono-<br>association                      | <i>Lb</i>          | <0.0001 | 0.1173           | 1         | 0.9847    | 0.0027    | 0.9243           | 0.0036       | 0.0138       | 0.1617       | 0.0019       | 0.0849       | 0.0006             | <0.0001         | 0.0949          | 0.1308          | 0.573                     | 0.0310 |
|                                           | <i>Lp</i>          | <0.0001 | 0.0614           | 0.9847    | 1         | 0.0014    | 0.8059           | 0.0021       | 0.0071       | 0.1658       | 0.0002       | 0.0688       | 0.0004             | <0.0001         | 0.0961          | 0.0969          | 0.4865                    | 0.0163 |
|                                           | <i>Ap</i>          | <0.0001 | 0.0575           | 0.0027    | 0.0014    | 1         | 0.0013           | 0.9144       | 0.4652       | 0.1869       | 0.8305       | 0.202        | 0.4248             | 0.0216          | 0.2611          | 0.1923          | 0.0022                    | 0.3033 |
|                                           | <i>Am</i>          | <0.0001 | 0.089            | 0.9243    | 0.8059    | 0.0013    | 1                | 0.0008       | 0.0044       | 0.0612       | 0.0017       | 0.052        | 0.0002             | <0.0001         | 0.0948          | 0.1009          | 0.6675                    | 0.0394 |
| Dual-association                          | <i>Lb+Lp</i>       | <0.0001 | 0.1162           | 0.0036    | 0.0021    | 0.9144    | 0.0008           | 1            | 0.577        | 0.0951       | 0.4639       | 0.1574       | 0.4751             | 0.0119          | 0.234           | 0.2266          | 0.0008                    | 0.5315 |
|                                           | <i>Lb+Ap</i>       | <0.0001 | 0.3515           | 0.0138    | 0.0071    | 0.4652    | 0.0044           | 0.577        | 1            | 0.1803       | 0.2086       | 0.4883       | 0.2246             | 0.0009          | 0.5509          | 0.5006          | 0.0047                    | 0.8503 |
|                                           | <i>Lb+Am</i>       | <0.0001 | 0.9579           | 0.1617    | 0.1658    | 0.1869    | 0.0612           | 0.0951       | 0.1803       | 1            | 0.0765       | 0.7014       | 0.0323             | 0.0001          | 0.9461          | 0.9233          | 0.0453                    | 0.5918 |
|                                           | <i>Lp+Ap</i>       | <0.0001 | 0.0168           | 0.0019    | 0.0002    | 0.8305    | 0.0017           | 0.4639       | 0.2086       | 0.0765       | 1            | 0.0943       | 0.6897             | 0.0683          | 0.2806          | 0.1923          | 0.0027                    | 0.2054 |
|                                           | <i>Lp+Am</i>       | <0.0001 | 0.8477           | 0.0849    | 0.0688    | 0.202     | 0.052            | 0.1574       | 0.4883       | 0.7014       | 0.0943       | 1            | 0.0571             | 0.0001          | 0.907           | 0.8301          | 0.0234                    | 0.6719 |
|                                           | <i>Ap+Am</i>       | <0.0001 | 0.0148           | 0.0006    | 0.0004    | 0.4248    | 0.0002           | 0.4751       | 0.2246       | 0.0323       | 0.6897       | 0.0571       | 1                  | 0.1428          | 0.0908          | 0.0757          | 0.0002                    | 0.1311 |
| Triple-<br>association                    | <i>Lb+Lp+Ap</i>    | <0.0001 | <0.0001          | <0.0001   | <0.0001   | 0.0216    | <0.0001          | 0.0119       | 0.0009       | 0.0001       | 0.0683       | 0.0001       | 0.1428             | 1               | 0.0012          | 0.0007          | <0.0001                   | 0.0009 |
|                                           | <i>Lb+Lp+Am</i>    | <0.0001 | 0.6197           | 0.0949    | 0.0961    | 0.2611    | 0.0948           | 0.234        | 0.5509       | 0.9461       | 0.2806       | 0.907        | 0.0908             | 0.0012          | 1               | 0.9247          | 0.0548                    | 0.9211 |
|                                           | <i>Lb+Ap+Am</i>    | <0.0001 | 0.7988           | 0.1308    | 0.0969    | 0.1923    | 0.1009           | 0.2266       | 0.5006       | 0.9233       | 0.1923       | 0.8301       | 0.0757             | 0.0007          | 0.9247          | 1               | 0.0592                    | 0.7937 |
|                                           | <i>Lp+Ap+Am</i>    | <0.0001 | 0.0561           | 0.573     | 0.4865    | 0.0022    | 0.6675           | 0.0008       | 0.0047       | 0.0453       | 0.0027       | 0.0234       | 0.0002             | <0.0001         | 0.0548          | 0.0592          | 1                         | 0.0338 |
| Quadruple-<br>association                 | <i>Lb+Lp+Ap+Am</i> | <0.0001 | 0.329            | 0.0310    | 0.0163    | 0.3033    | 0.0394           | 0.5315       | 0.8503       | 0.5918       | 0.2054       | 0.6719       | 0.1311             | 0.0009          | 0.9211          | 0.7937          | 0.0338                    | 1      |

**Supplementary Table 7. ANOVA and Tukey's HSD test results for fly lifespans treated with a combination of microbes (10<sup>8</sup> CFUs).**

| <b>ANOVA</b>                                              |             |                  |           |             |          |                  |          |          |          |          |          |                    |              |              |              |                       |          |
|-----------------------------------------------------------|-------------|------------------|-----------|-------------|----------|------------------|----------|----------|----------|----------|----------|--------------------|--------------|--------------|--------------|-----------------------|----------|
|                                                           |             | Sum of sqrs      | Df        | Mean Square | F        |                  |          |          |          |          |          |                    |              |              |              |                       | p-value  |
| Between groups                                            |             | 11103            | 15        | 740.2       | 2.734    |                  |          |          |          |          |          |                    |              |              |              |                       | 0.000343 |
| Residuals                                                 |             | 720387           | 2661      | 270.7       |          |                  |          |          |          |          |          |                    |              |              |              |                       |          |
| <b>Tukey's HSD (Honestly Significant Difference) test</b> |             |                  |           |             |          |                  |          |          |          |          |          |                    |              |              |              |                       |          |
| p-value<br>(10 <sup>8</sup> CFUs)                         | Ax          | Mono-association |           |             |          | Dual-association |          |          |          |          |          | Triple-association |              |              |              | Quadruple-association |          |
|                                                           |             | Lb               | Lp        | Ap          | Am       | Lb+Lp            | Lb+Ap    | Lb+Am    | Lp+Ap    | Lp+Am    | Ap+Am    | Lb+Lp<br>+Ap       | Lb+Lp<br>+Am | Lb+Ap<br>+Am | Lp+Ap<br>+Am | Lb+Lp<br>+Ap+Am       |          |
| Ax                                                        | 1           | 0.994681         | 1.000000  | 0.833558    | 0.999983 | 0.357371         | 0.979056 | 0.955049 | 0.226635 | 0.999914 | 0.022988 | 0.010642           | 0.295254     | 0.659396     | 1.000000     | 0.985834              |          |
| Mono-association                                          | Lb          | 0.994681         | 1         | 0.987869    | 1        | 1                | 0.996339 | 1        | 1        | 0.982957 | 1        | 0.635314           | 0.492619     | 0.991913     | 0.999955     | 0.999999              | 1        |
|                                                           | Lp          | 1                | 0.9878685 | 1           | 0.782016 | 0.999883         | 0.316062 | 0.961808 | 0.927661 | 0.199458 | 0.999595 | 0.020921           | 0.009965     | 0.260160     | 0.600623     | 0.999996              | 0.972496 |
|                                                           | Ap          | 0.833558         | 0.9999995 | 0.782016    | 1        | 0.998904         | 0.999999 | 1        | 1        | 0.999973 | 0.999811 | 0.958406           | 0.904932     | 0.999995     | 1            | 0.995235              | 1        |
|                                                           | Am          | 0.999983         | 1         | 0.999883    | 0.998904 | 1                | 0.909980 | 0.999998 | 0.999979 | 0.807035 | 1        | 0.257200           | 0.161460     | 0.867783     | 0.990172     | 1                     | 1        |
|                                                           | Lb+Lp       | 0.357371         | 0.9963387 | 0.316062    | 0.999999 | 0.909980         | 1        | 0.999204 | 0.999875 | 1        | 0.960528 | 0.999755           | 0.998445     | 1            | 1            | 0.843913              | 0.998743 |
|                                                           | Lb+Ap       | 0.979056         | 1         | 0.961808    | 1        | 0.999998         | 0.999204 | 1        | 1        | 0.99456  | 1        | 0.742384           | 0.606355     | 0.997838     | 0.999997     | 0.999965              | 1        |
| Dual-association                                          | Lb+Am       | 0.955049         | 1         | 0.927661    | 1        | 0.999979         | 0.999875 | 1        | 1        | 0.99868  | 0.999999 | 0.842333           | 0.730064     | 0.999568     | 1            | 0.999778              | 1        |
|                                                           | Lp+Ap       | 0.226635         | 0.9829566 | 0.199458    | 0.999973 | 0.807035         | 1        | 0.99456  | 0.998677 | 1        | 0.897808 | 0.999986           | 0.999836     | 1            | 1            | 0.715293              | 0.992377 |
|                                                           | Lp+Am       | 0.999914         | 1         | 0.999595    | 0.999811 | 1                | 0.960528 | 1        | 0.999999 | 0.897808 | 1        | 0.383468           | 0.263260     | 0.936032     | 0.997351     | 1                     | 1        |
|                                                           | Ap+Am       | 0.022988         | 0.6353135 | 0.020921    | 0.958406 | 0.2572           | 0.999755 | 0.742384 | 0.842333 | 0.999986 | 0.383468 | 1                  | 1            | 0.999942     | 0.990361     | 0.195019              | 0.715643 |
|                                                           | Lb+Lp+Ap    | 0.010642         | 0.4926191 | 0.009965    | 0.904932 | 0.16146          | 0.998445 | 0.606355 | 0.730064 | 0.999836 | 0.26326  | 1                  | 1            | 0.999514     | 0.970238     | 0.119008              | 0.577168 |
|                                                           | Lb+Lp+Am    | 0.295254         | 0.9919125 | 0.26016     | 0.999995 | 0.867783         | 1        | 0.997838 | 0.999568 | 1        | 0.936032 | 0.999942           | 0.999514     | 1            | 1            | 0.788867              | 0.996799 |
| Triple-association                                        | Lb+Ap+Am    | 0.659396         | 0.9999554 | 0.600623    | 1        | 0.990172         | 1        | 0.999997 | 1        | 1        | 0.997351 | 0.990361           | 0.970238     | 1            | 1            | 0.972992              | 0.999993 |
|                                                           | Lp+Ap+Am    | 1                | 0.9999985 | 0.999996    | 0.995235 | 1                | 0.843913 | 0.999965 | 0.999778 | 0.715293 | 1        | 0.195019           | 0.119008     | 0.788867     | 0.972992     | 1                     | 0.999985 |
| Quadruple-association                                     | Lb+Lp+Ap+Am | 0.985834         | 1         | 0.972496    | 1        | 1                | 0.998743 | 1        | 1        | 0.992377 | 1        | 0.715643           | 0.577168     | 0.996799     | 0.999993     | 0.999985              | 1        |

Supplementary Table 8. Log-rank test result of survival with a combination of microbes (10<sup>14</sup> CFUs).

| <i>p</i> -value<br>(10 <sup>14</sup> CFUs) | Conv                         | Ax      | Mono-association |           |           |           | Dual-association |              |              |              | Triple-association |              |                      |                      | Quadruple-<br>association |                      |                         |         |
|--------------------------------------------|------------------------------|---------|------------------|-----------|-----------|-----------|------------------|--------------|--------------|--------------|--------------------|--------------|----------------------|----------------------|---------------------------|----------------------|-------------------------|---------|
|                                            |                              |         | <i>Lb</i>        | <i>Lp</i> | <i>Ap</i> | <i>Am</i> | <i>Lb+Lp</i>     | <i>Lb+Ap</i> | <i>Lb+Am</i> | <i>Lp+Ap</i> | <i>Lp+Am</i>       | <i>Ap+Am</i> | <i>Lb+Lp<br/>+Ap</i> | <i>Lb+Lp<br/>+Am</i> | <i>Lb+Ap<br/>+Am</i>      | <i>Lp+Ap<br/>+Am</i> | <i>Lb+Lp<br/>+Ap+Am</i> |         |
| Conv                                       | 1                            | <0.0001 | <0.0001          | 0.0062    | 0.8377    | 0.0058    | 0.1285           | 0.771        | 0.9889       | 0.5488       | 0.1516             | 0.0397       | 0.2226               | 0.5122               | 0.0247                    | 0.408                | 0.1009                  |         |
| Ax                                         | <0.0001                      | 1       | <0.0001          | <0.0001   | <0.0001   | <0.0001   | <0.0001          | <0.0001      | <0.0001      | <0.0001      | <0.0001            | 0.0002       | <0.0001              | <0.0001              | <0.0001                   | <0.0001              | <0.0001                 |         |
| Mono-<br>association                       | <i>Lb</i>                    | <0.0001 | <0.0001          | 1         | 0.2541    | 0.0002    | 0.3553           | 0.0330       | <0.0001      | <0.0001      | 0.0015             | <0.0001      | <0.0001              | 0.0043               | 0.0009                    | 0.0780               | <0.0001                 | <0.0001 |
|                                            | <i>Lp</i>                    | 0.0062  | <0.0001          | 0.2541    | 1         | 0.0098    | 0.8710           | 0.4144       | 0.0162       | 0.0067       | 0.0560             | <0.0001      | <0.0001              | 0.0959               | 0.0379                    | 0.6300               | 0.0018                  | 0.0002  |
|                                            | <i>Ap</i>                    | 0.8377  | <0.0001          | 0.0002    | 0.0098    | 1         | 0.0133           | 0.1600       | 0.9552       | 0.7885       | 0.6910             | 0.1304       | 0.0176               | 0.3251               | 0.6974                    | 0.0486               | 0.3251                  | 0.0494  |
|                                            | <i>Am</i>                    | 0.0058  | <0.0001          | 0.3553    | 0.8710    | 0.0133    | 1                | 0.2910       | 0.0081       | 0.0047       | 0.0451             | <.0001       | <0.0001              | 0.0949               | 0.0318                    | 0.5329               | 0.0018                  | <.0001  |
| Dual-<br>association                       | <i>Lb+Lp</i>                 | 0.1285  | <0.0001          | 0.0330    | 0.4144    | 0.1600    | 0.2910           | 1            | 0.1752       | 0.0847       | 0.2913             | 0.0023       | 0.0002               | 0.5869               | 0.3166                    | 0.5590               | 0.0153                  | 0.0020  |
|                                            | <i>Lb+Ap</i>                 | 0.771   | <0.0001          | <0.0001   | 0.0162    | 0.9552    | 0.0081           | 0.1752       | 1            | 0.7121       | 0.6413             | 0.0766       | 0.0171               | 0.2926               | 0.7354                    | 0.0491               | 0.2346                  | 0.1067  |
|                                            | <i>Lb+Am</i>                 | 0.9889  | <0.0001          | <0.0001   | 0.0067    | 0.7885    | 0.0047           | 0.0847       | 0.7121       | 1            | 0.4702             | 0.1447       | 0.0546               | 0.1859               | 0.5345                    | 0.0223               | 0.4177                  | 0.2066  |
|                                            | <i>Lp+Ap</i>                 | 0.5488  | <0.0001          | 0.0015    | 0.0560    | 0.6910    | 0.0451           | 0.2913       | 0.6413       | 0.4702       | 1                  | 0.0526       | 0.0091               | 0.5111               | 0.9218                    | 0.1221               | 0.2115                  | 0.0359  |
| Triple-<br>association                     | <i>Lp+Am</i>                 | 0.1516  | <0.0001          | <0.0001   | <0.0001   | 0.1304    | <0.0001          | 0.0023       | 0.0766       | 0.1447       | 0.0526             | 1            | 0.7537               | 0.0078               | 0.0421                    | 0.0003               | 0.4952                  | 0.8921  |
|                                            | <i>Ap+Am</i>                 | 0.0397  | 0.0002           | <0.0001   | <0.0001   | 0.0176    | <0.0001          | 0.0002       | 0.0171       | 0.0546       | 0.0091             | 0.7537       | 1                    | 0.0006               | 0.0087                    | <.0001               | 0.3796                  | 0.3732  |
|                                            | <i>Lb+Lp+Ap</i>              | 0.2226  | <0.0001          | 0.0043    | 0.0959    | 0.3251    | 0.0949           | 0.5869       | 0.2926       | 0.1859       | 0.5111             | 0.0078       | 0.0006               | 1                    | 0.5501                    | 0.2559               | 0.0688                  | 0.0031  |
|                                            | <i>Lb+Lp<br/>+Am</i>         | 0.5122  | <0.0001          | 0.0009    | 0.0379    | 0.6974    | 0.0318           | 0.3166       | 0.7354       | 0.5345       | 0.9218             | 0.0421       | 0.0087               | 0.5501               | 1                         | 0.1200               | 0.1612                  | 0.0472  |
| Quadruple-<br>association                  | <i>Lb+Ap<br/>+Am</i>         | 0.0247  | <0.0001          | 0.0780    | 0.6300    | 0.0486    | 0.5329           | 0.5590       | 0.0491       | 0.0223       | 0.1221             | 0.0003       | <0.0001              | 0.2559               | 0.1200                    | 1                    | 0.0042                  | 0.0002  |
|                                            | <i>Lp+Ap<br/>+Am</i>         | 0.408   | <0.0001          | <0.0001   | 0.0018    | 0.3251    | 0.0018           | 0.0153       | 0.2346       | 0.4177       | 0.2115             | 0.4952       | 0.3796               | 0.0688               | 0.1612                    | 0.0042               | 1                       | 0.7844  |
| Quadruple-<br>association                  | <i>Lb+Lp<br/>+Ap<br/>+Am</i> | 0.1009  | <0.0001          | <0.0001   | 0.0002    | 0.0494    | <0.0001          | 0.0020       | 0.1067       | 0.2066       | 0.0359             | 0.8921       | 0.3732               | 0.0031               | 0.0472                    | 0.0002               | 0.7844                  | 1       |

**Supplementary Table 9. ANOVA and Tukey's HSD test result of lifespan with a combination of microbes (10<sup>14</sup> CFUs).**

| ANOVA                                              |             |                  |          |             |          |                  |          |          |          |          |          |                    |          |          |          |                       |          |
|----------------------------------------------------|-------------|------------------|----------|-------------|----------|------------------|----------|----------|----------|----------|----------|--------------------|----------|----------|----------|-----------------------|----------|
|                                                    |             | Sum of sqrs      | Df       | Mean Square | F        | p-value          |          |          |          |          |          |                    |          |          |          |                       |          |
| Between groups                                     |             | 31614            | 15       | 2107.6      | 2.962    | 0.000102         |          |          |          |          |          |                    |          |          |          |                       |          |
| Residuals                                          |             | 2254285          | 3168     | 711.6       |          |                  |          |          |          |          |          |                    |          |          |          |                       |          |
| Tukey's HSD (Honestly Significant Difference) test |             |                  |          |             |          |                  |          |          |          |          |          |                    |          |          |          |                       |          |
| p-value<br>(10 <sup>14</sup> CFUs)                 | Ax          | Mono-association |          |             |          | Dual-association |          |          |          |          |          | Triple-association |          |          |          | Quadruple-association |          |
|                                                    |             | Lb               | Lp       | Ap          | Am       | Lb+Lp            | Lb+Ap    | Lb+Am    | Lp+Ap    | Lp+Am    | Ap+Am    | Lb+Lp+Ap           | Lb+Lp+Am | Lb+Ap+Am | Lp+Ap+Am | Lb+Lp+Ap+Am           |          |
| Ax                                                 | 1           | 0.018132         | 0.355422 | 0.398274    | 0.000243 | 0.764823         | 0.973670 | 0.823822 | 0.003995 | 0.956063 | 0.998188 | 0.982943           | 0.882279 | 0.074832 | 0.486508 | 0.998588              |          |
| Mono-association                                   | Lb          | 0.018132         | 1        | 0.999582    | 0.999181 | 0.999752         | 0.963559 | 0.725966 | 0.940439 | 1        | 0.787346 | 0.456969           | 0.675366 | 0.901177 | 1        | 0.997407              | 0.437559 |
|                                                    | Lp          | 0.355422         | 0.999582 | 1           | 1        | 0.774434         | 1        | 0.999428 | 1        | 0.986822 | 0.999808 | 0.987151           | 0.998802 | 1        | 1        | 1                     | 0.984703 |
|                                                    | Ap          | 0.398274         | 0.999181 | 1           | 1        | 0.733675         | 1        | 0.999717 | 1        | 0.980349 | 0.999914 | 0.991688           | 0.999367 | 1        | 0.999998 | 1                     | 0.989958 |
|                                                    | Am          | 0.000243         | 0.999752 | 0.774434    | 0.733675 | 1                | 0.365608 | 0.105301 | 0.301995 | 1        | 0.135908 | 0.034791           | 0.085921 | 0.235038 | 0.987473 | 0.647719              | 0.031852 |
| Dual-association                                   | Lb+Lp       | 0.764823         | 0.963559 | 1           | 1        | 0.365608         | 1        | 1        | 1        | 0.814224 | 1        | 1                  | 1        | 1        | 0.998370 | 1                     | 0.999933 |
|                                                    | Lb+Ap       | 0.97367          | 0.725966 | 0.999428    | 0.999717 | 0.105301         | 1        | 1        | 1        | 0.433435 | 1        | 1                  | 1        | 1        | 0.939380 | 0.999940              | 1        |
|                                                    | Lb+Am       | 0.823822         | 0.940439 | 0.999999    | 1        | 0.301995         | 1        | 1        | 1        | 0.753798 | 1        | 1                  | 1        | 1        | 0.996122 | 1                     | 0.999984 |
|                                                    | Lp+Ap       | 0.003995         | 1        | 0.986822    | 0.980349 | 1                | 0.814224 | 0.433435 | 0.753798 | 1        | 0.503566 | 0.209144           | 0.382443 | 0.672628 | 0.999984 | 0.960918              | 0.196513 |
| Triple-association                                 | Lp+Am       | 0.956063         | 0.787346 | 0.999808    | 0.999914 | 0.135908         | 1        | 1        | 1        | 0.503566 | 1        | 1                  | 1        | 1        | 0.962067 | 0.999985              | 1        |
|                                                    | Ap+Am       | 0.998188         | 0.456969 | 0.987151    | 0.991688 | 0.034791         | 0.999954 | 1        | 0.99999  | 0.209144 | 1        | 1                  | 1        | 1        | 0.772048 | 0.996793              | 1        |
|                                                    | Lb+Lp+Ap    | 0.982943         | 0.675366 | 0.998802    | 0.999367 | 0.085921         | 1        | 1        | 1        | 0.382443 | 1        | 1                  | 1        | 1        | 0.916661 | 0.999844              | 1        |
|                                                    | Lb+Lp+Am    | 0.882279         | 0.901177 | 0.999993    | 0.999998 | 0.235038         | 1        | 1        | 1        | 0.672628 | 1        | 0.999999           | 1        | 1        | 0.990479 | 1                     | 1        |
| Quadruple-association                              | Lb+Ap+Am    | 0.074832         | 1        | 1           | 0.999998 | 0.987473         | 0.99837  | 0.93938  | 0.996122 | 0.999984 | 0.962067 | 0.772048           | 0.916661 | 0.990479 | 1        | 0.999985              | 0.755034 |
|                                                    | Lp+Ap+Am    | 0.486508         | 0.997407 | 1           | 1        | 0.647719         | 1        | 0.99994  | 1        | 0.960918 | 0.999985 | 0.996793           | 0.999844 | 1        | 0.999985 | 1                     | 0.995999 |
|                                                    | Lb+Lp+Ap+Am | 0.998588         | 0.437559 | 0.984703    | 0.989958 | 0.031852         | 0.999933 | 1        | 0.999984 | 0.196513 | 1        | 1                  | 1        | 0.999998 | 0.755034 | 0.996                 | 1        |



**Supplementary Table 10. ANOVA and Tukey's HSD test result of CFUs from fly's body with a combination of microbes (10<sup>8</sup> CFUs).**

| ANOVA                                              |                  |             |        |        |        |                  |             |        |        |        |                    |              |              |                       |                 |        |
|----------------------------------------------------|------------------|-------------|--------|--------|--------|------------------|-------------|--------|--------|--------|--------------------|--------------|--------------|-----------------------|-----------------|--------|
|                                                    |                  | Sum of sqrs |        |        |        | Df               | Mean Square |        |        |        |                    | F            | p-value      |                       |                 |        |
| Between groups                                     |                  | 749375      |        |        |        | 14               | 53527       |        |        |        |                    | 2.838        | 0.00257      |                       |                 |        |
| Residuals                                          |                  | 1131742     |        |        |        | 60               | 18862       |        |        |        |                    |              |              |                       |                 |        |
| Tukey's HSD (Honestly Significant Difference) test |                  |             |        |        |        |                  |             |        |        |        |                    |              |              |                       |                 |        |
| p-value<br>(10 <sup>8</sup> CFUs)                  | Mono-association |             |        |        |        | Dual-association |             |        |        |        | Triple-association |              |              | Quadruple-association |                 |        |
|                                                    | Lb               | Lp          | Ap     | Am     | Lb+Lp  | Lb+Ap            | Lb+Am       | Lp+Ap  | Lp+Am  | Ap+Am  | Lb+Lp<br>+Ap       | Lb+Lp<br>+Am | Lb+Ap<br>+Am | Lp+Ap<br>+Am          | Lb+Lp<br>+Ap+Am |        |
| Mono-association                                   | Lb               | 1           | 1      | 0.1774 | 0.9998 | 1                | 0.0051      | 0.9997 | 0.9999 | 0.9641 | 0.9981             | 0.3202       | 0.9999       | 0.9547                | 0.6564          | 0.8382 |
|                                                    | Lp               | 1           | 1      | 0.2586 | 1      | 1                | 0.0091      | 0.9999 | 1      | 0.9880 | 0.9997             | 0.4342       | 1            | 0.9838                | 0.7749          | 0.9160 |
|                                                    | Ap               | 0.1774      | 0.2586 | 1      | 0.7178 | 0.2978           | 0.9926      | 0.7470 | 0.5230 | 0.9754 | 0.8495             | 1            | 0.6875       | 0.9813                | 1               | 0.9984 |
|                                                    | Am               | 0.9998      | 1      | 0.7178 | 1      | 1                | 0.0701      | 1      | 1      | 1      | 1                  | 0.8809       | 1            | 1                     | 0.9913          | 0.9994 |
| Dual-association                                   | Lb+Lp            | 1           | 1      | 0.2978 | 1      | 1                | 0.0114      | 0.9999 | 1      | 0.9929 | 0.9999             | 0.4845       | 1            | 0.9901                | 0.8172          | 0.9390 |
|                                                    | Lb+Ap            | 0.0051      | 0.0091 | 0.9926 | 0.0701 | 0.0114           | 1           | 0.0788 | 0.0326 | 0.2946 | 0.1235             | 0.9547       | 0.0622       | 0.3202                | 0.7325          | 0.5283 |
|                                                    | Lb+Am            | 0.9997      | 0.9999 | 0.7470 | 1      | 0.9999           | 0.0788      | 1      | 1      | 1      | 1                  | 0.8994       | 1            | 0.9999                | 0.9938          | 0.9996 |
|                                                    | Lp+Ap            | 0.9999      | 1      | 0.5230 | 1      | 1                | 0.0326      | 1      | 1      | 0.9998 | 0.9999             | 0.7276       | 1            | 0.9996                | 0.9529          | 0.9922 |
|                                                    | Lp+Am            | 0.9641      | 0.9880 | 0.9754 | 1      | 0.9929           | 0.2946      | 1      | 0.9998 | 1      | 1                  | 0.9971       | 1            | 1                     | 1               | 1      |
| Triple-association                                 | Ap+Am            | 0.9981      | 0.9997 | 0.8495 | 1      | 0.9999           | 0.1235      | 1      | 0.9999 | 1      | 1                  | 0.9547       | 1            | 1                     | 0.9987          | 1      |
|                                                    | Lb+Lp+Ap         | 0.3202      | 0.4342 | 1      | 0.8809 | 0.4845           | 0.9547      | 0.8994 | 0.7276 | 0.9971 | 0.9547             | 1            | 0.8605       | 0.9981                | 1               | 1      |
|                                                    | Lb+Lp+Am         | 0.9999      | 1      | 0.6875 | 1      | 1                | 0.0622      | 1      | 1      | 1      | 1                  | 0.8605       | 1            | 1                     | 0.9880          | 0.9990 |
|                                                    | Lb+Ap+Am         | 0.9547      | 0.9838 | 0.9813 | 1      | 0.9901           | 0.3202      | 0.9999 | 0.9996 | 1      | 1                  | 0.9981       | 1            | 1                     | 1               | 1      |
|                                                    | Lp+Ap+Am         | 0.6564      | 0.7749 | 1      | 0.9913 | 0.8172           | 0.7325      | 0.9938 | 0.9529 | 1      | 0.9987             | 1            | 0.9880       | 1                     | 1               | 1      |
| Quadruple-association                              | Lb+Lp+Ap+Am      | 0.8382      | 0.9160 | 0.9984 | 0.9994 | 0.9390           | 0.5283      | 0.9996 | 0.9922 | 1      | 1                  | 1            | 0.9990       | 1                     | 1               | 1      |

**Supplementary Table 11. ANOVA and Tukey's HSD test result of CFUs from fly's body with a combination of microbes (10<sup>14</sup> CFUs).**

| ANOVA                                              |             |                  |         |        |        |                  |        |        |        |          |        |                    |          |          |                       |             |
|----------------------------------------------------|-------------|------------------|---------|--------|--------|------------------|--------|--------|--------|----------|--------|--------------------|----------|----------|-----------------------|-------------|
|                                                    |             | Sum of sqrs      |         | Df     |        | Mean Square      |        | F      |        | p-value  |        |                    |          |          |                       |             |
| Between groups                                     |             | 668496           |         | 14     |        | 47750            |        | 4.901  |        | < 0.0001 |        |                    |          |          |                       |             |
| Residuals                                          |             | 584590           |         | 60     |        | 9743             |        |        |        |          |        |                    |          |          |                       |             |
| Tukey's HSD (Honestly Significant Difference) test |             |                  |         |        |        |                  |        |        |        |          |        |                    |          |          |                       |             |
| p-value<br>(10 <sup>14</sup> CFUs)                 |             | Mono-association |         |        |        | Dual-association |        |        |        |          |        | Triple-association |          |          | Quadruple-association |             |
|                                                    |             | Lb               | Lp      | Ap     | Am     | Lb+Lp            | Lb+Ap  | Lb+Am  | Lp+Ap  | Lp+Am    | Ap+Am  | Lb+Lp+Ap           | Lb+Lp+Am | Lb+Ap+Am | Lp+Ap+Am              | Lb+Lp+Ap+Am |
| Mono-association                                   | Lb          | 1                | 1       | 0.1824 | 0.9255 | 0.9832           | 0.3352 | 0.9705 | 0.2053 | 0.8912   | 0.9999 | 0.9958             | <0.0001  | 0.1450   | 0.1672                | 0.4407      |
|                                                    | Lp          | 1                | 1       | 0.2531 | 0.9650 | 0.9945           | 0.4354 | 0.9890 | 0.2817 | 0.9438   | 1      | 0.9990             | <0.0001  | 0.2053   | 0.2339                | 0.5506      |
|                                                    | Ap          | 0.1824           | 0.2531  | 1      | 0.9917 | 0.9535           | 1      | 0.9718 | 1      | 0.9960   | 0.7046 | 0.8943             | 0.0652   | 1        | 1                     | 1           |
|                                                    | Am          | 0.9255           | 0.9650  | 0.9917 | 1      | 1                | 0.9995 | 1      | 0.9945 | 1        | 0.9999 | 1                  | 0.0012   | 0.9832   | 0.9890                | 0.9999      |
|                                                    | Lb+Lp       | 0.9832           | 0.9945  | 0.9535 | 1      | 1                | 0.9930 | 1      | 0.9650 | 1        | 1      | 1                  | 0.0004   | 0.9255   | 0.9438                | 0.9983      |
| Dual-association                                   | Lb+Ap       | 0.3352           | 0.4354  | 1      | 0.9995 | 0.993            | 1      | 0.9968 | 1      | 0.9998   | 0.8779 | 0.9754             | 0.0278   | 1        | 1                     | 1           |
|                                                    | Lb+Am       | 0.9705           | 0.9890  | 0.9718 | 1      | 1                | 0.9968 | 1      | 0.9796 | 1        | 1      | 1                  | 0.0006   | 0.9517   | 0.9650                | 0.9994      |
|                                                    | Lp+Ap       | 0.2053           | 0.2817  | 1      | 0.9945 | 0.9650           | 1      | 0.9796 | 1      | 0.9976   | 0.7406 | 0.9150             | 0.0563   | 1        | 1                     | 1           |
|                                                    | Lp+Am       | 0.8912           | 0.9438  | 0.9960 | 1      | 1                | 0.9998 | 1      | 0.9976 | 1        | 0.9998 | 1                  | 0.0016   | 0.9912   | 0.9945                | 1           |
|                                                    | Ap+Am       | 0.9999           | 1       | 0.7046 | 0.9999 | 1                | 0.8779 | 1      | 0.7406 | 0.9998   | 1      | 1                  | 0.0006   | 0.6344   | 0.6781                | 0.9374      |
| Triple-association                                 | Lb+Lp+Ap    | 0.9958           | 0.9990  | 0.8943 | 1      | 1                | 0.9754 | 1      | 0.9150 | 1        | 1      | 1                  | 0.0002   | 0.8485   | 0.8779                | 0.9917      |
|                                                    | Lb+Lp+Am    | < 0.0001         | <0.0001 | 0.0652 | 0.0012 | 0.0004           | 0.0278 | 0.0006 | 0.0563 | 0.0016   | 0.0006 | 0.0002             | 1        | 0.0850   | 0.0723                | 0.0170      |
|                                                    | Lb+Ap+Am    | 0.1450           | 0.2053  | 1      | 0.9832 | 0.9255           | 1      | 0.9517 | 1      | 0.9912   | 0.6344 | 0.8485             | 0.0850   | 1        | 1                     | 1           |
|                                                    | Lp+Ap+Am    | 0.1672           | 0.2339  | 1      | 0.9890 | 0.9438           | 1      | 0.965  | 1      | 0.9945   | 0.6781 | 0.8779             | 0.0723   | 1        | 1                     | 1           |
|                                                    | Lb+Lp+Ap+Am | 0.4407           | 0.5506  | 1      | 0.9999 | 0.9983           | 1      | 0.9994 | 1      | 1        | 0.9374 | 0.9917             | 0.0170   | 1        | 1                     | 1           |

Please browse Full Text version to see the data of Supplementary Table 12:

**Supplementary Table 12. Summary of axenic fly lifespan data in previous reports.**

**Supplementary Table 13. Composition of fly husbandry food and bacteria incubation media.**

| Food                                        | Composition                     |
|---------------------------------------------|---------------------------------|
| Cornmeal-sugar-yeast (CSY) media            | 5.2% cornmeal                   |
|                                             | 11% sugar                       |
|                                             | 2.5% instant yeast              |
|                                             | 0.5% propionic acid             |
|                                             | 0.04% methyl-4-hydroxybenzoate  |
| Plate count agar (PCA)                      | 1% agar                         |
|                                             | 0.5% tryptone                   |
|                                             | 0.25% yeast extract             |
|                                             | 0.1% glucose                    |
|                                             | 1.5% bacto agar                 |
|                                             | 1% peptone                      |
|                                             | 1% beef extract                 |
| <i>Lactobacillus</i> -selective (MRS) media | 0.5% yeast extract              |
|                                             | 2% dextrose                     |
|                                             | 0.1% polysorbate                |
|                                             | 0.2% ammonium citrate           |
|                                             | 0.5% sodium acetate             |
|                                             | 0.01% magnesium sulfate         |
|                                             | 0.005% manganese sulfate        |
|                                             | 0.2% dipotassium phosphate      |
|                                             | 1.5% bacto agar (BD & Difco)    |
|                                             | 2.5% D-mannitol (BD & Difco)    |
|                                             | 0.5% yeast extract (BD & Difco) |
| <i>Acetobacter</i> -selective media         | 0.3% peptone (BD & Difco)       |
|                                             | 1.5% bacto agar                 |

**Supplementary Table 14. 16S rRNA PCR primer sequences.**

|                                        | Forward (5'-3')      | Reverse (5'-3')        |
|----------------------------------------|----------------------|------------------------|
| <i>Lactobacillus</i> -selective primer | GCAAGGCTGAAACTCAAAGG | TTCATGTAGGCGAGTTGCAG   |
| <i>Acetobacter</i> -selective primer   | CCCTTATGTCCTGGGCTACA | TCACCGGCTTAAGGTCAAAC   |
| Universal primer (27F, 1492R)          | AGAGTTTGATCMTGGCTCAG | TACGGYTACCTTGTTACGACTT |
